# Supplementary material for: 20-Hydroxyecdysone Confers Antioxidant and Antineoplastic Properties in Human Non-Small Cell Lung Cancer Cells
Source: MDPI journal article supplement (doi:10.3390/metabo13050656), 2023-05-15
Supplement: s1 [file s1]

**Table S6 Data.** Median values (gathered over a month) of lung cancer patient's survival with low and high expression of studied genes. Values were calculated using the online software KM Plotter (<https://kmplot.com/analysis/>).

|               | Low expression cohort<br>(months) | High expression cohort<br>(months) | p-value |
|---------------|-----------------------------------|------------------------------------|---------|
| <b>c-Myc</b>  | 79.5                              | 59                                 | 5.8e-6  |
| <b>Hk2</b>    | 85                                | 56.5                               | 5.9e-6  |
| <b>LDHA</b>   | 90                                | 47.77                              | 4.0e-14 |
| <b>ATF4</b>   | 81.1                              | 57                                 | 6.0e-6  |
| <b>PHGDH</b>  | 85                                | 52                                 | 3.4e-9  |
| <b>PSAT1</b>  | 93                                | 46.7                               | <1e-16  |
| <b>SHMT2</b>  | 89                                | 48                                 | 1.5e-10 |
| <b>MTHFD2</b> | 85                                | 52                                 | 6.6e-7  |
