# Supplementary material for: 20-Hydroxyecdysone Confers Antioxidant and Antineoplastic Properties in Human Non-Small Cell Lung Cancer Cells
Source: MDPI journal article supplement (doi:10.3390/metabo13050656), 2023-05-15
Supplement: s1 [file s1]

Primers used for Real-Time PCR:

ATF4\_F: GGAGATAGGAAGCCAGACTACA;  
ATF4\_R: GGCTCATA-CAGATGCCACTATC;  
PSAT1\_F: CAGGAAGGTGTGCTGACTATG;  
PSAT1\_R: CCCAAGTTTAGGGTGAACGATA;  
PSPH\_F: AGCTGTTCCAGACAACTATAAGG;  
PSPH\_HS\_R: CTTCTGCTTTCAAGCCAATG;  
PHGDH\_F: GATCTGGCCTCTCTGTGATTT;  
PHGDH\_R: GGGCAAAGGTGTTGTCATTC;  
SHMT2\_F: AGGTCAGGGCTCATCTTCTA;  
SHMT2\_R: ATGGGAACACGGCAAAGT;  
MTHFD2\_F: AGCTTTACCTCTTGGCAGTATC;  
MTHFD2\_R: CTG-TAATTCCCAGCGTCTAGTG;  
HK2\_F: AAGGCTTCAAGGCATCTG;  
HK2\_R: GCCAGGTCCTTCACTGTCTC;  
LDHA\_F: AGATTCCAGTGTGCCTGTATG;  
LDHA\_R: ACCTCTTCCACTGTTCTTATC;  
Myc\_F: CTCCTCCTCGTCGCAGTAGA;  
Myc\_R: GCTGCTTAGACGCTGGATTT;  
 $\beta$ -Actin\_F: GGATCAGCAAGCAGGAGTATG;  
 $\beta$ -Actin\_R: AGAAAGGGTGTAACGCAACTAA;  
Oct4\_F: TCGCAAGCCCTCATTTCACC;  
Oct4\_R: GCCAGGTCCGAGGATCAAC;  
Nestin\_F: GTAGCTCCCAGAGAGGGGAA;  
Nestin\_R: CTCTAGAGGGCCAGGGACTT;  
c-Kit\_F: GATGGCACCTGAAAGCATTT;  
c-Kit\_R: TCCGGAAGCCTTCCTTGATC;  
CD44\_F: AAGGTGGAGCAAACACAACC;  
CD44\_R: ACTGCAATGCAAACCTGCAAG;  
ALDH\_F: GTTGTCAAACCAGCAGACCA;  
ALDH\_R: CTGTAGGCCCATTAACCAGGA.
