# Supplementary material for: 20-Hydroxyecdysone Confers Antioxidant and Antineoplastic Properties in Human Non-Small Cell Lung Cancer Cells
Source: MDPI journal article supplement (doi:10.3390/metabo13050656), 2023-05-15
Supplement: s1 [file s1]

**Figure 1 Supplementary Data.** The 1.5 hours of treatment with 20E suppresses ROS in NSCLC cell lines. N=4

A549

| 0    |        | 0,1      |          | 1        |          | 10       |          | 100      |          |
|------|--------|----------|----------|----------|----------|----------|----------|----------|----------|
| Mean | SEM    | Mean     | SEM      | Mean     | SEM      | Mean     | SEM      | Mean     | SEM      |
| 1    | 2e-002 | 0.748036 | 0.029524 | 0.702656 | 0.036697 | 0.695774 | 0.025364 | 0.829809 | 0.017109 |

H1299

| 0    |        | 0,1     |         | 1        |          | 10       |          | 100      |          |
|------|--------|---------|---------|----------|----------|----------|----------|----------|----------|
| Mean | SEM    | Mean    | SEM     | Mean     | SEM      | Mean     | SEM      | Mean     | SEM      |
| 1    | 2e-002 | 0.77238 | 0.01119 | 0.713652 | 0.021327 | 0.573844 | 0.023590 | 0.638733 | 0.031027 |

H460

| 0    |        | 0,1      |          | 1        |          | 10       |          | 100      |          |
|------|--------|----------|----------|----------|----------|----------|----------|----------|----------|
| Mean | SEM    | Mean     | SEM      | Mean     | SEM      | Mean     | SEM      | Mean     | SEM      |
| 1    | 1e-002 | 0.790966 | 0.036352 | 0.655795 | 0.027595 | 0.647772 | 0.025799 | 0.708875 | 0.020095 |

**Figure 3 Supplementary Data.** 20E inhibits the growth of NSCLC cell lines. A-C. MTT data for H1299, A549 and H460 cell lines. N=8. D. Colony formation assay. N=3.

3A.

| 0      |        | 0.1      |          | 1        |          | 10       |          | 100      |          |
|--------|--------|----------|----------|----------|----------|----------|----------|----------|----------|
| Mean   | SEM    | Mean     | SEM      | Mean     | SEM      | Mean     | SEM      | Mean     | SEM      |
| 1.0000 | 0.0250 | 0.912000 | 0.034000 | 0.894000 | 0.033000 | 0.875000 | 0.032000 | 0.912000 | 0.025000 |

3B.

| 0    |        | 0.1      |          | 1        |          | 10       |          | 100      |          |
|------|--------|----------|----------|----------|----------|----------|----------|----------|----------|
| Mean | SEM    | Mean     | SEM      | Mean     | SEM      | Mean     | SEM      | Mean     | SEM      |
| 1    | 9e-003 | 0.821244 | 0.013591 | 0.905391 | 0.012946 | 0.853546 | 0.021369 | 0.835613 | 0.018053 |

3C.

| 0    |        | 0,1  |      | 1     |       | 10    |       | 100   |       |
|------|--------|------|------|-------|-------|-------|-------|-------|-------|
| Mean | SEM    | Mean | SEM  | Mean  | SEM   | Mean  | SEM   | Mean  | SEM   |
| 1    | 2e-002 | 0.97 | 0.02 | 0.887 | 0.041 | 0.917 | 0.014 | 0.900 | 0.031 |

3D.

H1299

| 0     |     | 0.1      |        | 1        |        | 10       |        | 100  |     |
|-------|-----|----------|--------|----------|--------|----------|--------|------|-----|
| Mean  | SEM | Mean     | SEM    | Mean     | SEM    | Mean     | SEM    | Mean | SEM |
| 153.5 | 1.1 | 134.6667 | 3.3599 | 135.3333 | 5.2747 | 138.6667 | 1.5776 | 145  | 2   |

A549

| 0     |     | 0.1      |        | 1        |        | 10       |        | 100  |     |
|-------|-----|----------|--------|----------|--------|----------|--------|------|-----|
| Mean  | SEM | Mean     | SEM    | Mean     | SEM    | Mean     | SEM    | Mean | SEM |
| 153.5 | 1.1 | 134.6667 | 3.3599 | 133.6667 | 3.8064 | 138.6667 | 1.5776 | 145  | 2   |

H460

| 0        |        | 0.1      |        | 1        |        | 10   |     | 100      |        |
|----------|--------|----------|--------|----------|--------|------|-----|----------|--------|
| Mean     | SEM    | Mean     | SEM    | Mean     | SEM    | Mean | SEM | Mean     | SEM    |
| 198.6667 | 4.6571 | 188.6667 | 7.2541 | 160.6667 | 4.7981 | 171  | 2   | 158.3333 | 3.9441 |

**Figure 5 Supplementary Data.** 20E suppresses the expression of genes coding for enzymes of glycolysis, one-carbon metabolism, and their transcriptional regulators (Real-Time PCR). N=3.

H1299

|        |   | 0      |         | 0.001   |         | 0.01    |         | 0.1     |         | 1       |         | 10      |         | 100     |     |
|--------|---|--------|---------|---------|---------|---------|---------|---------|---------|---------|---------|---------|---------|---------|-----|
|        |   | Mean   | SEM     | Mean    | SEM     | Mean    | SEM     | Mean    | SEM     | Mean    | SEM     | Mean    | SEM     | Mean    | SEM |
| c-Myc  | 1 | 1e-001 | 0.74243 | 0.08971 | 0.44322 | 0.06094 | 0.41888 | 0.05666 | 0.40636 | 0.05850 | 0.24159 | 0.06978 | 0.48892 | 0.06164 |     |
| HK2    | 1 | 7e-002 | 0.19658 | 0.01609 | 0.15986 | 0.02830 | 0.07775 | 0.00580 | 0.10486 | 0.01435 | 0.10671 | 0.03221 | 0.07876 | 0.00905 |     |
| LDHA   | 1 | 5e-002 | 0.24007 | 0.02232 | 0.22637 | 0.02750 | 0.26896 | 0.01892 | 0.25854 | 0.04609 | 0.13830 | 0.03595 | 0.25385 | 0.05281 |     |
| ATF4   | 1 | 9e-002 | 0.34440 | 0.02222 | 0.29077 | 0.03077 | 0.18586 | 0.00890 | 0.16701 | 0.00994 | 0.15472 | 0.01011 | 0.22742 | 0.01029 |     |
| PHGDH  | 1 | 8e-002 | 0.28797 | 0.01844 | 0.25769 | 0.03976 | 0.24502 | 0.02222 | 0.15598 | 0.01214 | 0.22462 | 0.02177 | 0.16662 | 0.02132 |     |
| PSAT1  | 1 | 8e-002 | 0.41818 | 0.02833 | 0.43414 | 0.02238 | 0.34129 | 0.02899 | 0.44394 | 0.09353 | 0.49063 | 0.02492 | 0.31713 | 0.01973 |     |
| PSPH   | 1 | 1e-001 | 0.51772 | 0.03986 | 0.47051 | 0.05683 | 0.39488 | 0.06163 | 0.38548 | 0.06670 | 0.45815 | 0.04434 | 0.45182 | 0.12563 |     |
| SHMT2  | 1 | 5e-002 | 0.37845 | 0.02805 | 0.52956 | 0.03217 | 0.36623 | 0.02222 | 0.41424 | 0.01749 | 0.37586 | 0.05047 | 0.32524 | 0.01571 |     |
| MTHFD2 | 1 | 1e-001 | 0.17582 | 0.01343 | 0.15934 | 0.01038 | 0.12027 | 0.00699 | 0.09296 | 0.00998 | 0.08960 | 0.00423 | 0.11270 | 0.00472 |     |

H460

|        |   | 0      |          | 0.001    |         | 0.01    |         | 0.1     |          | 1        |         | 10      |          | 100      |     |
|--------|---|--------|----------|----------|---------|---------|---------|---------|----------|----------|---------|---------|----------|----------|-----|
|        |   | Mean   | SEM      | Mean     | SEM     | Mean    | SEM     | Mean    | SEM      | Mean     | SEM     | Mean    | SEM      | Mean     | SEM |
| c-Myc  | 1 | 7e-002 | 0.864870 | 0.058400 | 0.52847 | 0.06130 | 0.45967 | 0.07625 | 0.386270 | 0.074610 | 0.08615 | 0.01326 | 0.141340 | 0.028740 |     |
| HK2    | 1 | 6e-002 | 0.816360 | 0.095780 | 0.65738 | 0.06734 | 0.72645 | 0.07296 | 0.511899 | 0.067170 | 0.41246 | 0.05973 | 0.515169 | 0.043560 |     |
| LDHA   | 1 | 9e-002 | 0.716450 | 0.056470 | 0.68957 | 0.06132 | 0.52211 | 0.06144 | 0.444090 | 0.020600 | 0.29159 | 0.03165 | 0.491990 | 0.022150 |     |
| ATF4   | 1 | 7e-002 | 0.815080 | 0.033360 | 0.57552 | 0.04516 | 0.38479 | 0.00469 | 0.449630 | 0.084020 | 0.41343 | 0.02998 | 0.464640 | 0.032670 |     |
| PHGDH  | 1 | 4e-002 | 0.885970 | 0.026640 | 0.63031 | 0.09329 | 0.56168 | 0.01712 | 0.547050 | 0.043460 | 0.40359 | 0.05575 | 0.800960 | 0.045960 |     |
| PSAT1  | 1 | 3e-002 | 0.957390 | 0.109280 | 0.39074 | 0.00926 | 0.44049 | 0.05624 | 0.684420 | 0.097930 | 0.66089 | 0.04480 | 0.399070 | 0.019670 |     |
| PSPH   | 1 | 6e-002 | 0.726700 | 0.015950 | 0.56890 | 0.08712 | 0.35977 | 0.01252 | 0.390300 | 0.014180 | 0.42589 | 0.03722 | 0.797030 | 0.052140 |     |
| SHMT2  | 1 | 7e-002 | 0.859469 | 0.118990 | 0.77096 | 0.02568 | 0.68762 | 0.13549 | 0.626780 | 0.049400 | 0.53448 | 0.10041 | 0.774410 | 0.051510 |     |
| MTHFD2 | 1 | 4e-002 | 0.805390 | 0.044160 | 0.53736 | 0.06180 | 0.29590 | 0.02729 | 0.324500 | 0.031120 | 0.51245 | 0.03541 | 0.203000 | 0.012980 |     |

A549

|        |   | 0      |         | 0.01    |         | 0.1     |         | 1       |         | 10      |         | 100     |     |
|--------|---|--------|---------|---------|---------|---------|---------|---------|---------|---------|---------|---------|-----|
|        |   | Mean   | SEM     | Mean    | SEM     | Mean    | SEM     | Mean    | SEM     | Mean    | SEM     | Mean    | SEM |
| c-Myc  | 1 | 1e-001 | 0.71090 | 0.07900 | 0.32060 | 0.03670 | 0.25980 | 0.03134 | 0.44560 | 0.02560 | 0.72850 | 0.09674 |     |
| HK2    | 1 | 1e-001 | 0.91788 | 0.19880 | 0.87094 | 0.11290 | 0.59174 | 0.05670 | 0.49760 | 0.06924 | 0.77430 | 0.08304 |     |
| LDHA   | 1 | 1e-001 | 0.71720 | 0.05449 | 0.54321 | 0.04000 | 0.42960 | 0.04660 | 0.63950 | 0.08530 | 0.74504 | 0.06110 |     |
| ATF4   | 1 | 2e-001 | 0.09244 | 0.02559 | 0.39905 | 0.06020 | 0.28925 | 0.05954 | 0.35443 | 0.04697 | 0.68524 | 0.09585 |     |
| PHGDH  | 1 | 1e-001 | 0.12820 | 0.06053 | 0.45210 | 0.03302 | 0.35975 | 0.02490 | 0.50664 | 0.07277 | 0.68626 | 0.07527 |     |
| PSAT1  | 1 | 1e-001 | 0.24543 | 0.07171 | 0.30035 | 0.07394 | 0.49962 | 0.04940 | 0.52062 | 0.04533 | 0.69842 | 0.08587 |     |
| PSPH   | 1 | 1e-001 | 0.07872 | 0.03449 | 0.11321 | 0.04099 | 0.32960 | 0.03516 | 0.53950 | 0.09953 | 0.74504 | 0.06533 |     |
| SHMT2  | 1 | 1e-001 | 0.02090 | 0.00681 | 0.21106 | 0.01969 | 0.23298 | 0.03716 | 0.66986 | 0.02628 | 0.85469 | 0.09674 |     |
| MTHFD2 | 1 | 2e-001 | 0.54667 | 0.08123 | 0.61766 | 0.08847 | 0.51395 | 0.05834 | 0.67692 | 0.07547 | 0.83999 | 0.09578 |     |

**Figure 7 Supplementary Data.** 20E suppressed glycolysis and respiration in H460 cells. SeaHorse data. MitoStress test kit was used. A. and B. – OCR and ECAR plots. OCR – Oxygen Consumption Rate (shows respiration), ECAR – Extracellular Acidification Rate (shows glycolysis). C. Basal respiration. D. Maximal respiration. E. Basal ECAR (glycolysis). F. ATP production (in terms of respiration).

Glycolysis (ECAR); Basal respiration (OCR). N=5.

|       | ECAR (mpH/min) |              | OCR (pmol/min) |              |
|-------|----------------|--------------|----------------|--------------|
| Group | Value          | StandardMean | Value          | StandardMean |
| 0     | 63,44030       | 2,42249      | 299,03845      | 21,41248     |
| 0.1   | 56,44988       | 3,57530      | 214,79247      | 32,17472     |
| 1     | 51,27338       | 4,37246      | 166,21213      | 29,64260     |
| 10    | 50,60178       | 4,53704      | 165,71639      | 34,75343     |
| 100   | 48,47167       | 3,36740      | 145,26754      | 22,87614     |

**Figure 8 Supplementary Data.** 20E sensitizes A549 cells to inhibitors of glycolysis (2-DG – 2-deoxyglucose, 3-BP – 3-brompyruvate), oxidative phosphorylation (MF - metformin), and one-carbon me-tabolism (Gemc – gemcitabine, 5-FU – 5-fluouracil). Cells were treated with 20E only (A.) or in combination with: B. Gemc; C. 5-FU; D. 2-DG; E. 3-BP; F. MF. MTT assay data are presented paired with Combination Index (CI) plots calculated using CompuSyn Software (<https://www.combosyn.com>). N=8.

|                   | Result   | SEM      |
|-------------------|----------|----------|
| 0                 | 1        | 0,026512 |
| 0,1uM 20E         | 0,954598 | 0,026496 |
| 1uM 20E           | 0,894253 | 0,003073 |
| 10uM 20E          | 0,939655 | 0,033152 |
|                   |          |          |
| 0                 | 1        | 0,026512 |
| 5-FU (5 uM)       | 0,793678 | 0,042616 |
| 5-FU + 0,1uM 20E  | 0,641379 | 0,009088 |
| 5-FU + 1uM 20E    | 0,691379 | 0,054206 |
| 5-FU + 10uM 20E   | 0,648851 | 0,014874 |
|                   |          |          |
| 0                 | 1        | 0,026512 |
| MF (5 mM)         | 0,941954 | 0,019203 |
| MF + 0,1uM 20E    | 0,783333 | 0,020822 |
| MF + 1uM 20E      | 0,816092 | 0,043691 |
| MF + 10uM 20E     | 0,82069  | 0,017235 |
|                   |          |          |
|                   |          |          |
| 0                 | 1        | 0,026512 |
| Gemc (500 nM)     | 0,844253 | 0,042188 |
| Gemc + 0,1uM 20E  | 0,745977 | 0,013904 |
| Gemc + 1uM 20E    | 0,754598 | 0,031055 |
| Gemc + 10uM 20E   | 0,641379 | 0,009088 |
|                   |          |          |
| 0                 | 1        | 0,026512 |
| 2-DG (2.5 mM)     | 0,768391 | 0,040193 |
| 2-DG + 0,1 uM 20E | 0,624138 | 0,061293 |
| 2-DG + 1uM 20E    | 0,565517 | 0,064859 |

|                  |          |          |
|------------------|----------|----------|
| 2-DG + 10uM 20E  | 0,493678 | 0,048051 |
|                  |          |          |
| 0                | 1        | 0,026512 |
| 3-BP (100 uM)    | 0,828161 | 0,039037 |
| 3-BP + 0,1uM 20E | 0,714368 | 0,031633 |
| 3-BP + 1uM 20E   | 0,657471 | 0,044874 |
| 3-BP + 10uM 20E  | 0,564943 | 0,050763 |

**Figure 10 Supplementary Data.** 20E significantly suppresses the expression of markers of CSCs. Real-time PCR of A. H1299, B. H460 cell lines, respectively. Results are shown as means  $\pm$  SEM relative to control (DMSO-treated cells). N=3.

10A.

|        | 0    |        | 0,1     |         | 1       |         | 10      |         | 100     |         |
|--------|------|--------|---------|---------|---------|---------|---------|---------|---------|---------|
|        | Mean | SEM    | Mean    | SEM     | Mean    | SEM     | Mean    | SEM     | Mean    | SEM     |
| ALDH   | 1    | 6e-002 | 0.16470 | 0.03773 | 0.35385 | 0.01069 | 0.48179 | 0.04771 | 0.32492 | 0.01009 |
| c-Kit  | 1    | 1e-001 | 0.00247 | 0.00092 | 0.00484 | 0.00060 | 0.01072 | 0.00117 | 0.00649 | 0.00134 |
| CD44   | 1    | 1e-001 | 0.00022 | 0.00002 | 0.00026 | 0.00005 | 0.00065 | 0.00015 | 0.00331 | 0.00241 |
| Nestin | 1    | 9e-002 | 0.09502 | 0.00527 | 0.14714 | 0.00923 | 0.30791 | 0.02344 | 0.09840 | 0.00341 |
| Oct4A  | 1    | 6e-002 | 0.03942 | 0.00566 | 0.07144 | 0.00276 | 0.15825 | 0.01198 | 0.05965 | 0.01195 |

10B.

|        | 0       |         | 0,1     |         | 1       |         | 10      |         | 100     |         |
|--------|---------|---------|---------|---------|---------|---------|---------|---------|---------|---------|
|        | Mean    | SEM     |
| ALDH   | 3.80673 | 0.45032 | 0.92943 | 0.07223 | 1.11585 | 0.03767 | 1.69825 | 0.19273 | 0.91756 | 0.08027 |
| c-Kit  | 3.80673 | 0.32967 | 0.11692 | 0.01257 | 0.15726 | 0.01423 | 0.56354 | 0.02554 | 0.20842 | 0.01497 |
| CD44   | 2.08399 | 0.18611 | 0.83526 | 0.03026 | 1.14357 | 0.04690 | 1.40917 | 0.03983 | 1.00000 | 0.07139 |
| Nestin | 3.80673 | 0.28313 | 0.49553 | 0.02185 | 0.58697 | 0.02204 | 1.10682 | 0.06600 | 0.46550 | 0.03583 |
| Oct4A  | 3.80673 | 0.25962 | 0.33549 | 0.03190 | 0.58165 | 0.11141 | 0.80000 | 0.08423 | 0.34425 | 0.03512 |

**Figure S1 Data.** The 24 hours of treatment with 20E suppresses ROS in NSCLC cell lines. A-C – diagrams of rela-tive DCDFA fluorescence for H1299, H460 and A549 cells treated with 0.1-100  $\mu$ M of 20E. Y-axis shows the degree of fluorescence intensity of 20E treated cells relative to fluorescence of control cells. D-F – flow cytometry plots for DCDFA fluorescence, ‘median’ of the peak for the control sample is showed by vertical bar. N=8.

H1299

|   | 0      |     | 0.1      |          | 1        |          | 10       |          | 100      |          |
|---|--------|-----|----------|----------|----------|----------|----------|----------|----------|----------|
|   | Mean   | SEM | Mean     | SEM      | Mean     | SEM      | Mean     | SEM      | Mean     | SEM      |
| 1 | 3e-002 |     | 0.856887 | 0.019883 | 0.796743 | 0.016335 | 0.754724 | 0.033375 | 0.831065 | 0.039934 |

H460

|   | 0      |     | 0.1      |          | 1      |        | 10       |          | 100      |          |
|---|--------|-----|----------|----------|--------|--------|----------|----------|----------|----------|
|   | Mean   | SEM | Mean     | SEM      | Mean   | SEM    | Mean     | SEM      | Mean     | SEM      |
| 1 | 2e-002 |     | 0.801229 | 0.019601 | 0.7941 | 0.0198 | 0.746198 | 0.004798 | 0.717739 | 0.008864 |

A549

| 0    |        | 0.1      |          | 1        |          | 10       |          | 100      |          |
|------|--------|----------|----------|----------|----------|----------|----------|----------|----------|
| Mean | SEM    | Mean     | SEM      | Mean     | SEM      | Mean     | SEM      | Mean     | SEM      |
| 1    | 3e-002 | 0.858987 | 0.035520 | 0.828355 | 0.022932 | 0.701004 | 0.021312 | 0.765042 | 0.014818 |

**Figure S8 Data.** 20E suppressed glycolysis and respiration in H1299 cells. SeaHorse data. Energy Phenotype test kit was used. A-D – OCR and ECAR plots. OCR – Oxygen Consumption Rate (shows respiration), ECAR – Extracellular Acidification Rate (shows glycolysis). E. Energetic map.

|       | ECAR (mpH/min) |              | OCR (pmol/min) |              |
|-------|----------------|--------------|----------------|--------------|
| Group | Value          | StandardMean | Value          | StandardMean |
| 0     | 41,08417       | 2,93233      | 90,56009       | 8,23473      |
| 1     | 32,28381       | 6,46456      | 65,60394       | 13,87788     |
| 10    | 29,58232       | 3,17483      | 53,84928       | 8,37005      |
| 100   | 28,12036       | 4,00277      | 56,88195       | 7,20560      |
|       |                |              |                |              |

**Figure S9 Data.** 20E suppressed glycolysis and respiration in A549 cells. SeaHorse data. Energy Phenotype test kit was used. A-D – OCR and ECAR plots. OCR – Oxygen Consumption Rate (shows respiration), ECAR – Extracellular Acidification Rate (shows glycolysis). E. Energetic map.

|       | ECAR (mpH/min) |              | OCR (pmol/min) |              |
|-------|----------------|--------------|----------------|--------------|
| Group | Value          | StandardMean | Value          | StandardMean |
| 0     | 52,03607       | 1,58128      | 196,89375      | 12,75162     |
| 1     | 39,98037       | 4,26154      | 157,29196      | 24,96845     |
| 10    | 38,49924       | 5,97182      | 136,17414      | 31,32935     |
| 100   | 18,44500       | 3,30770      | 60,40648       | 14,75454     |
|       |                |              |                |              |

**Figure S10 Data.** 20E reduced ATP content in A. H1299 and B. H460 cells. ATP assay kit (Sigma) was used. N=3.

H460

| 0     |       | 0.1      |          | 1        |          | 10       |          | 100      |          |
|-------|-------|----------|----------|----------|----------|----------|----------|----------|----------|
| Mean  | SD    | Mean     | SD       | Mean     | SD       | Mean     | SD       | Mean     | SD       |
| 1.000 | 0.006 | 0.464912 | 0.003899 | 0.830409 | 0.008066 | 0.608187 | 0.009893 | 0.918129 | 0.003386 |

| 0        |          | 0.1      |          | 1        |          | 10       |          | 100      |          |
|----------|----------|----------|----------|----------|----------|----------|----------|----------|----------|
| Mean     | SD       |
| 1.000000 | 0.060016 | 0.584778 | 0.019480 | 0.597589 | 0.024809 | 0.502638 | 0.009136 | 0.676714 | 0.008959 |

**Figure S11 Data.** 20E sensitizes A549 cells to inhibitors of glycolysis (2-DG – 2-deoxyglucose, 3-BP – 3-bromopyruvate), oxidative phosphorylation (MF - metformin), and one-carbon metabolism (Gemc – gemcitabine, 5-FU – 5-fluorouracil). Cells were treated with 20E only (A.) or in combination with: B. Gemc; C. 5-FU; D. 2-DG; E. 3-BP; F. MF. MTT assay data are presented in pair with Combination Index (CI) plots calculated using CompuSyn Software (<https://www.combosyn.com>). MTT assay, A549 cells. N=8.

|                   |  | Results  | SEM      |
|-------------------|--|----------|----------|
| 0                 |  | 1        | 0,045234 |
| 0,1uM 20E         |  | 1,00869  | 0,0368   |
| 1uM 20E           |  | 0,924131 | 0,025846 |
| 10uM 20E          |  | 0,909425 | 0,042957 |
|                   |  |          |          |
| 0                 |  | 1        | 0,045234 |
| 2-DG (2.5 mM)     |  | 0,794118 | 0,046815 |
| 2-DG + 0,1 uM 20E |  | 0,642714 | 0,024135 |
| 2-DG + 1uM 20E    |  | 0,575869 | 0,058602 |
| 2-DG + 10uM 20E   |  | 0,513369 | 0,061963 |
|                   |  |          |          |
| 0                 |  | 1        | 0,045234 |
| MF (5 mM)         |  | 0,753008 | 0,049504 |
| MF + 0,1uM 20E    |  | 0,722594 | 0,061876 |
| MF + 1uM 20E      |  | 0,555481 | 0,048898 |
| MF + 10uM 20E     |  | 0,613971 | 0,048427 |
|                   |  |          |          |
| 0                 |  | 1        | 0,045234 |
| 5-FU (5 uM)       |  | 0,78643  | 0,034502 |
| 5-FU + 0,1uM 20E  |  | 0,707553 | 0,049998 |
| 5-FU + 1uM 20E    |  | 0,606283 | 0,028465 |
| 5-FU + 10uM 20E   |  | 0,584559 | 0,018668 |
|                   |  |          |          |
| 0                 |  | 1        | 0,019779 |
| Gemc (500 nM)     |  | 0,693387 | 0,028011 |
| Gemc + 0,1uM 20E  |  | 0,671935 | 0,020055 |
| Gemc + 1uM 20E    |  | 0,573419 | 0,036358 |

|                     |  |          |          |
|---------------------|--|----------|----------|
| Gemc + 10uM<br>20E  |  | 0,513419 | 0,04201  |
|                     |  |          |          |
| 0                   |  | 1        | 0,022783 |
| 3-BP (100 uM)       |  | 0,817698 | 0,02409  |
| 3-BP + 0,1uM<br>20E |  | 0,694127 | 0,026296 |
| 3-BP + 1uM 20E      |  | 0,631497 | 0,021802 |
| 3-BP + 10uM<br>20E  |  | 0,580301 | 0,02051  |

**Figure S12 Data.** 48 h treatment with 20E significantly suppressed expression of markers of CSCs in spheroid culture. A. H460 cell line. B. H1299 cell line. Real-time PCR. Results are shown as means  $\pm$  SEM relative to control (DMSO-treated cells). N=3.

12A. H460

|        | 0    |        | 1       |         |
|--------|------|--------|---------|---------|
|        | Mean | SEM    | Mean    | SEM     |
| CD44   | 1    | 3e-002 | 0.18039 | 0.01207 |
| c-Kit  | 1    | 1e-001 | 0.03869 | 0.00203 |
| ALDH1  | 1    | 3e-002 | 0.16189 | 0.00466 |
| Nestin | 1    | 7e-002 | 0.07154 | 0.03267 |
| Oct4   | 1    | 2e-001 | 0.09077 | 0.00735 |

12B. H1299

|        | 0    |        | 1       |         |
|--------|------|--------|---------|---------|
|        | Mean | SEM    | Mean    | SEM     |
| c-Kit  | 1    | 1e-001 | 0.15730 | 0.09460 |
| ALDH1  | 1    | 1e-001 | 0.13835 | 0.01891 |
| Nestin | 1    | 2e-001 | 0.01021 | 0.00161 |
| Oct4   | 1    | 1e-001 | 0.09979 | 0.00013 |
